# Supplementary material
Source: HighWire-hosted journal article supplement (https://www.cmajopen.ca/highwire/filestream/81050/field_highwire_adjunct_files/1/open-2016-0103-2-at.pdf)
Supplement: open-2016-0103-2-at.pdf [file open-2016-0103-2-at.pdf]

**Appendix 2** (as supplied by the authors): Sensitivity analysis exploring publication cut-offs of 3, 4, and 5 publications while in the joint program

|                                                                 | <b>3 Publications</b> | <b>4 Publications</b> | <b>5 Publications</b> |
|-----------------------------------------------------------------|-----------------------|-----------------------|-----------------------|
| <b>Sex PhD Student, n (%)</b>                                   |                       |                       |                       |
| <b>Male</b>                                                     | 55 (61.1%)            | 51 (64.6%)            | 38 (60.3%)            |
| <b>Female</b>                                                   | 35 (38.9%)            | 28 (35.4%)            | 25 (39.7%)            |
| <b>Sex Master Student, n (%)</b>                                |                       |                       |                       |
| <b>Male</b>                                                     | 15 (51.7%)            | 10 (52.6%)            | 5 (45.4%)             |
| <b>Female</b>                                                   | 14 (48.3%)            | 9 (47.4%)             | 6 (54.6%)             |
| <b>Odds of Matching to Family Medicine<sup>a</sup>, OR (CI)</b> | 2.86 (1.49-5.16)      | 2.64 (1.31-5.34)      | 2.28 (1.07-4.86)      |

OR odds ratio; CI confidence interval

a After adjustment for sex; having 3, 4, or 5 or fewer publications while in the joint program
